# Supplementary material for: The critical re-evaluation of the aromatic/antiaromatic nature of Ti3(CO)3: a missed opportunity?
Source: Royal Society of Chemistry journal article supplement (doi:10.1039/c0cp01519a), 2011-01-01
Supplement: c0cp01519a.pdf [file c0cp01519a.pdf]

## **The critical reevaluation of the aromatic/antiaromatic nature of $\text{Ti}_3(\text{CO})_3$ : A missed opportunity?**

**Cina Foroutan-Nejad,<sup>a</sup> Shant Shahbazian<sup>b</sup> and Parviz Rashidi-Ranjbar<sup>a\*</sup>**

**a. School of Chemistry, College of Science, University of Tehran, Tehran, Iran.  
Fax: 0098 21 6649 5291 ; Tel: 0098 21 6111 3301.**

**b. Department of Chemistry, Faculty of Sciences, Shahid Beheshti University, G.C.,  
Evin, Tehran, Iran. Tel: 0098 21 2990 2883.**

**Emails:**

[cina-foroutan@khayam.ut.ac.ir](mailto:cina-foroutan@khayam.ut.ac.ir)

[chemist\\_shant@yahoo.com](mailto:chemist_shant@yahoo.com)

[ranjbar@khayam.ut.ac.ir](mailto:ranjbar@khayam.ut.ac.ir)

**Table S-1. The stability of the optimized geometries of different species at BP86/6-311+G(d) and LSDA/6-311+G(d) levels.**

| Molecule                          | BP86/6-311+G(d) | LSDA/6-311+G(d) |
|-----------------------------------|-----------------|-----------------|
| $[\text{Sc}_3(\text{CO})_3]^+$    | Instable        | Stable          |
| $\text{Ti}_3(\text{CO})_3$        | Stable          | Stable          |
| $[\text{V}_3(\text{CO})_3]^+$     | Stable          | Stable          |
| $[\text{Cr}_3(\text{CO})_3]^{2+}$ | Instable        | Instable        |
| $\text{Ni}_3(\text{CO})_3$        | Stable          | Stable          |
| $[\text{Cu}_3(\text{CO})_3]^-$    | Stable          | Stable          |

**Table S-2. NICS<sub>zz</sub> values of  $\text{Ti}_3(\text{CO})_3$  at various distances above the ring plane of  $\text{Ti}_3(\text{CO})_3$  at four DFT levels with three basis sets.**

| $\text{Ti}_3(\text{CO})_3$ |                         | 6-311+G(d) | 6-311+G(2df) | 6-311+G(3d2f) |
|----------------------------|-------------------------|------------|--------------|---------------|
| LSDA                       | NICS(0) <sub>zz</sub>   | -120.61    | -120.09      | -119.78       |
|                            | NICS(0.5) <sub>zz</sub> | -81.37     | -81.19       | -80.81        |
|                            | NICS(1) <sub>zz</sub>   | -20.83     | -20.96       | -20.76        |
| BP86                       | NICS(0) <sub>zz</sub>   | -117.89    | -117.22      | -116.76       |
|                            | NICS(0.5) <sub>zz</sub> | -80.31     | -80.02       | -79.06        |
|                            | NICS(1) <sub>zz</sub>   | -20.77     | -20.82       | -20.64        |
| MPWPW91                    | NICS(0) <sub>zz</sub>   | -132.18    | -115.73      | -115.13       |
|                            | NICS(0.5) <sub>zz</sub> | -87.75     | -79.0        | -78.48        |
|                            | NICS(1) <sub>zz</sub>   | -15.03     | -20.48       | -20.26        |
| B3LYP                      | NICS(0) <sub>zz</sub>   | -140.85    | -138.47      | -137.86       |
|                            | NICS(0.5) <sub>zz</sub> | -94.58     | -93.04       | -92.48        |
|                            | NICS(1) <sub>zz</sub>   | -18.43     | -18.14       | -17.91        |

**Table S-3. NICS<sub>zz</sub> values of metal carbonyls at various distances above the ring planes of the molecules.**

| Metal Carbonyls    |                         | $\text{V}_3(\text{CO})_3^+$ | $\text{Ni}_3(\text{CO})_3$ | $\text{Cu}_3(\text{CO})_3^-$ |
|--------------------|-------------------------|-----------------------------|----------------------------|------------------------------|
| LSDA<br>6-311+G(d) | NICS(0) <sub>zz</sub>   | -238.41                     | -12.09                     | -35.82                       |
|                    | NICS(0.5) <sub>zz</sub> | -132.63                     | -9.08                      | -32.28                       |
|                    | NICS(1) <sub>zz</sub>   | -7.72                       | -4.81                      | -26.20                       |
| BP86<br>6-311+G(d) | NICS(0) <sub>zz</sub>   | -239.76                     | -13.99                     | -33.38                       |
|                    | NICS(0.5) <sub>zz</sub> | -135.69                     | -10.57                     | -30.09                       |
|                    | NICS(1) <sub>zz</sub>   | -8.26                       | -5.40                      | -24.45                       |

**Table S-4. Detailed dissected CMO-NICS analysis of  $\text{Ti}_3(\text{CO})_3$ : contribution of diamagnetic shielding ( $\sigma^{\text{dia}}$ ) and contributions of gauge ( $\sigma^{\text{gauge}}$ ), occupied to occupied ( $\sigma^{\text{para,occ,occ}}$ ) and occupied to virtual ( $\sigma^{\text{para,occ-vir}}$ ) components of paramagnetic shielding. The main contribution of occupied to virtual component (Occ $\rightarrow$ Vir) for each canonical MO and the total contribution of each canonical MO (NICS<sub>MO</sub>) are separately presented.**

| Orbitals | $\sigma^{\text{dia}}$ | $\sigma^{\text{gauge}}$ | $\sigma^{\text{para,occ,occ}}$ | $\sigma^{\text{para,occ-vir}}$             | Occ $\rightarrow$ Vir                                                            | NICS <sub>MO</sub> |
|----------|-----------------------|-------------------------|--------------------------------|--------------------------------------------|----------------------------------------------------------------------------------|--------------------|
| 49       | -5.8                  | 2.4                     | -1.8                           | -8.8 $\times$ 2<br>-10.4 $\times$ 2<br>3.0 | 49 $\rightarrow$ 61, 62<br>49 $\rightarrow$ 63, 64<br>49 $\rightarrow$ other Vir | -40.8              |
| 50       | -5.8                  | 2.4                     | -1.8                           | -8.8 $\times$ 2<br>-10.4 $\times$ 2<br>3.0 | 50 $\rightarrow$ 61, 62<br>50 $\rightarrow$ 63, 64<br>50 $\rightarrow$ other Vir | -40.8              |
| 51       | -6.2                  | -4.9                    | 0.0                            | 23.0<br>2.54                               | 51 $\rightarrow$ 65<br>51 $\rightarrow$ other Vir                                | 14.4               |
| 52       | -0.7                  | -3.2                    | 0.0                            | 10.1<br>1.9 $\times$ 2<br>0.3              | 52 $\rightarrow$ 57<br>52 $\rightarrow$ 63, 64<br>52 $\rightarrow$ other Vir     | 10.4               |
| 53       | -0.9                  | -2.3                    | 0.0                            | -4.7 $\times$ 2<br>2.7                     | 53 $\rightarrow$ 61, 62<br>53 $\rightarrow$ other Vir                            | -9.8               |
| 54       | -0.9                  | -2.3                    | 0.0                            | -4.7 $\times$ 2<br>2.7                     | 54 $\rightarrow$ 61, 62<br>54 $\rightarrow$ other Vir                            | -9.8               |

**Figure S-1. The energy diagram of some of the highest occupied MO of  $Ti_3(CO)_3$**

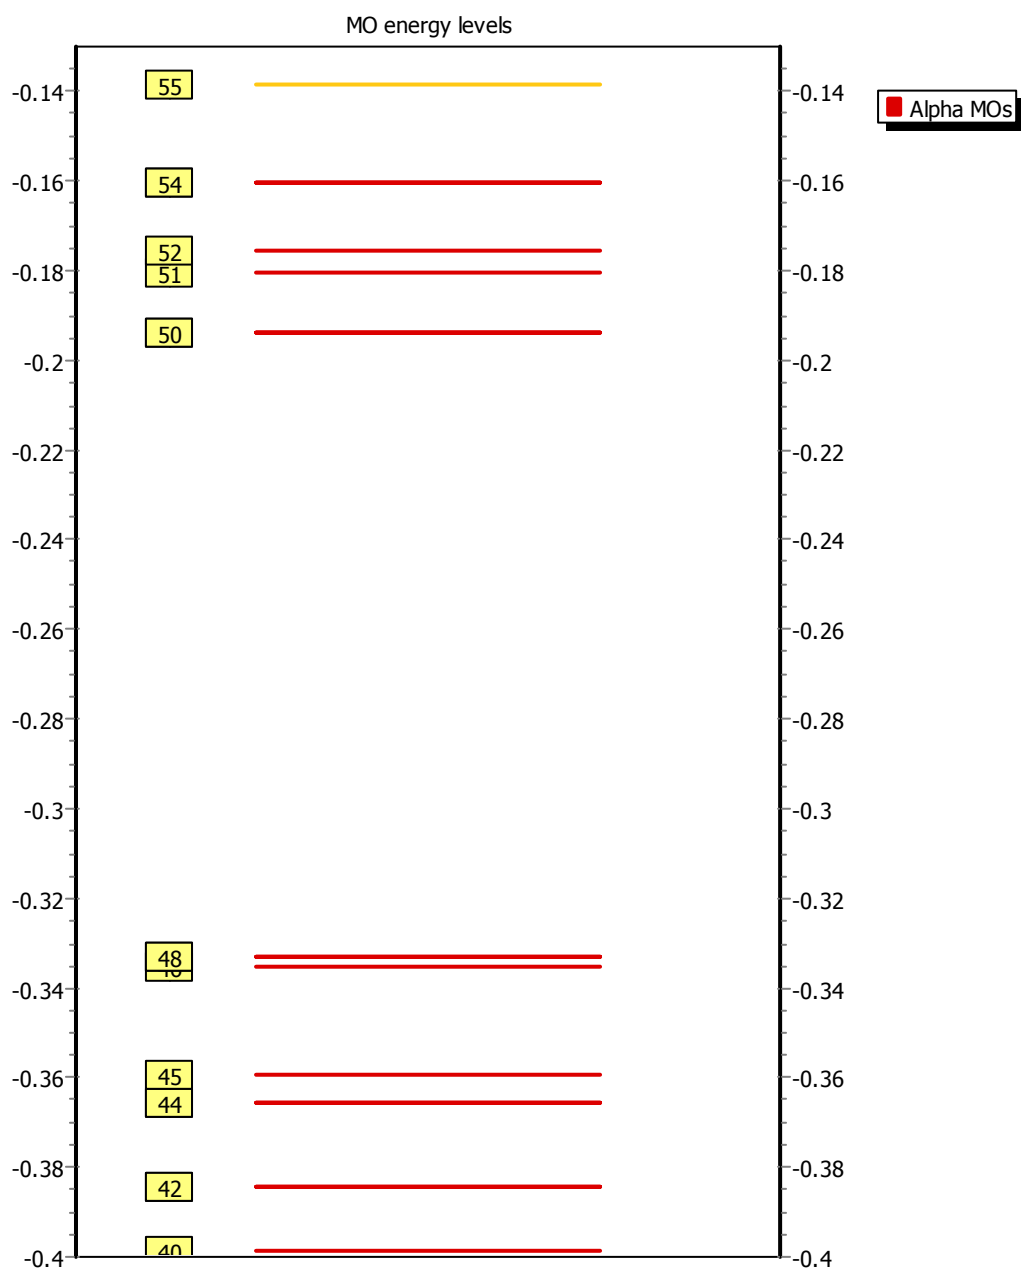

**Figure S-2. The morphology of the seven highest occupied MO of  $V_3(CO)_3^+$**

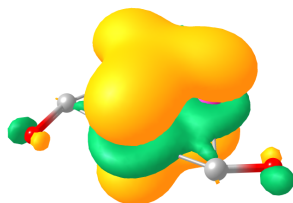

**MO 55**

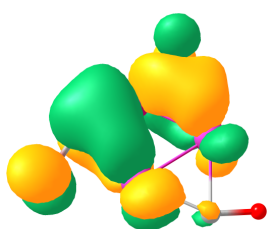

**MO 54**

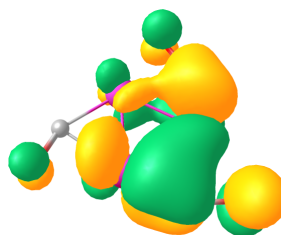

**MO 53**

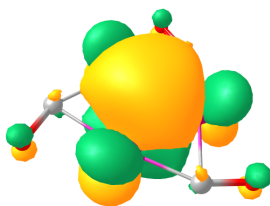

**MO 52**

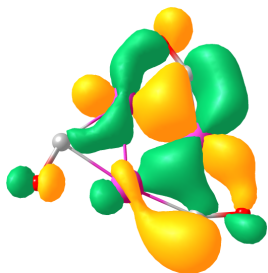

**MO 51**

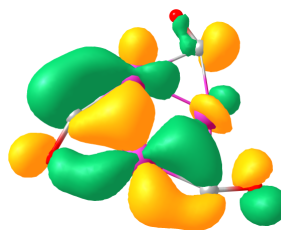

**MO 50**

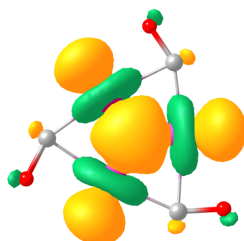

**MO 49**

**Figure S-3.** NICS scan plot of  $V_3^+$ , this is evidently similar to that of  $V_3(CO)_3^+$  and  $V_3^-$ .

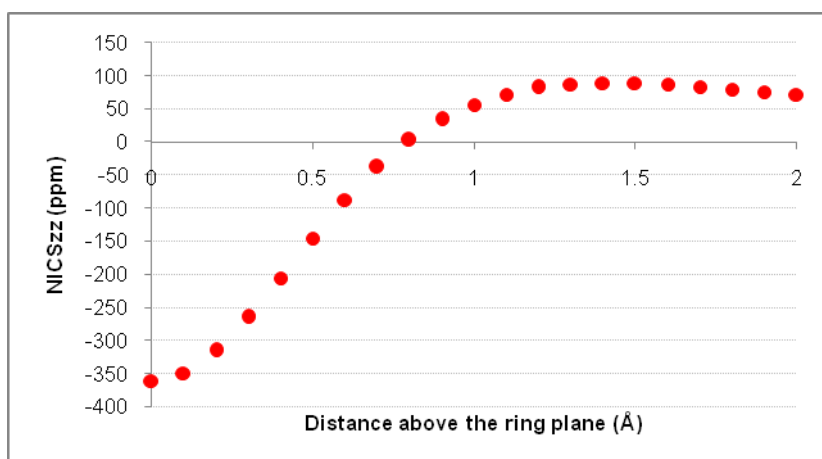

**Scheme S-1. QTAIM analysis: The detailed results for the four local minima (*E* stands for energy, *Q* for charge and  $\lambda$  for the localization index)**

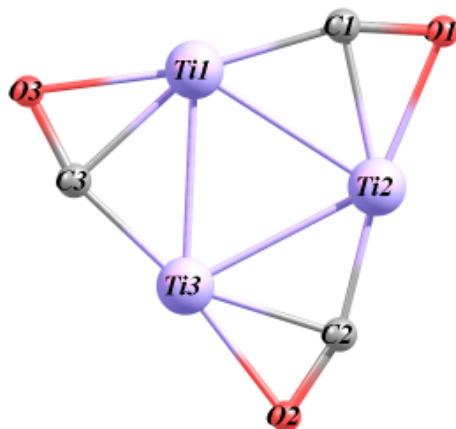

| Atoms           | E          | Q      | $\lambda$ |
|-----------------|------------|--------|-----------|
| Ti <sub>1</sub> | -849.46216 | 1.140  | 18.7      |
| Ti <sub>2</sub> | -849.46227 | 1.140  | 18.7      |
| Ti <sub>3</sub> | -849.46195 | 1.140  | 18.7      |
| C <sub>1</sub>  | -37.73682  | -0.036 | 4.3       |
| C <sub>2</sub>  | -37.73618  | -0.034 | 4.3       |
| C <sub>3</sub>  | -37.73707  | -0.037 | 4.3       |
| O <sub>1</sub>  | -75.73840  | -1.102 | 8.0       |
| O <sub>2</sub>  | -75.73849  | -1.102 | 8.0       |
| O <sub>3</sub>  | -75.73849  | -1.101 | 8.0       |

$$E_{\text{Tot}} - \Sigma E_{\Omega} = 2.4 \text{ kcal mol}^{-1} \quad Q_{\text{Tot}} - \Sigma Q_{\Omega} = -0.0075 \text{ e}$$

| Delocalization index | $\delta(\text{Ti}_i, x)$ | $\delta(\text{C}_i, x)$ |
|----------------------|--------------------------|-------------------------|
| Ti <sub>2</sub>      | 0.82                     |                         |
| Ti <sub>3</sub>      | 0.82                     |                         |
| C <sub>1</sub>       | 1.14                     |                         |
| C <sub>2</sub>       | 0.07                     | 0.07                    |
| C <sub>3</sub>       | 0.74                     | 0.07                    |
| O <sub>1</sub>       | 0.19                     | 1.33                    |
| O <sub>2</sub>       | 0.02                     | 0.02                    |
| O <sub>3</sub>       | 0.51                     | 0.06                    |

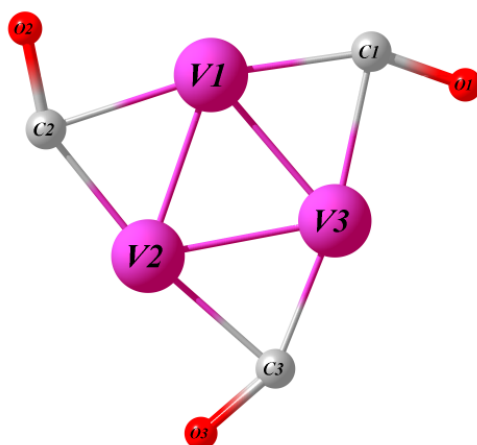

| Atoms          | E          | Q      | $\lambda$ |
|----------------|------------|--------|-----------|
| V <sub>1</sub> | -944.15642 | 0.877  | 19.4      |
| V <sub>2</sub> | -944.00785 | 0.881  | 19.3      |
| V <sub>3</sub> | -944.00692 | 0.879  | 19.3      |
| C <sub>1</sub> | -37.59219  | 0.456  | 3.9       |
| C <sub>2</sub> | -37.59206  | 0.458  | 3.9       |
| C <sub>3</sub> | -37.59245  | 0.456  | 3.9       |
| O <sub>1</sub> | -75.81305  | -1.004 | 7.9       |
| O <sub>2</sub> | -75.81291  | -1.004 | 7.9       |
| O <sub>3</sub> | -75.81311  | -1.004 | 7.9       |

$$E_{\text{Tot}} - \Sigma E_{\Omega} = 91.4 \text{ kcal mol}^{-1} \quad Q_{\text{Tot}} - \Sigma Q_{\Omega} = 0.0030 \text{ e}$$

| Delocalization index | $\delta(V_1, x)$ | $\delta(C_1, x)$ |
|----------------------|------------------|------------------|
| V <sub>2</sub>       | 1.64             |                  |
| V <sub>3</sub>       | 1.64             |                  |
| C <sub>1</sub>       | 0.95             |                  |
| C <sub>2</sub>       | 0.60             | 0.04             |
| C <sub>3</sub>       | 0.09             | 0.04             |
| O <sub>1</sub>       | 0.18             | 1.52             |
| O <sub>2</sub>       | 0.39             | 0.03             |
| O <sub>3</sub>       | 0.04             | 0.02             |



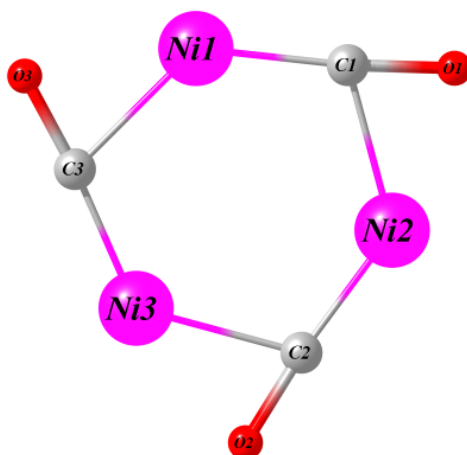

| Atoms           | E           | Q      | $\lambda$ |
|-----------------|-------------|--------|-----------|
| Ni <sub>1</sub> | -1508.58718 | 0.466  | 25.9      |
| Ni <sub>2</sub> | -1508.58860 | 0.466  | 25.9      |
| Ni <sub>3</sub> | -1508.58909 | 0.466  | 25.9      |
| C <sub>1</sub>  | -37.53540   | 0.575  | 3.7       |
| C <sub>2</sub>  | -37.53571   | 0.574  | 3.7       |
| C <sub>3</sub>  | -37.53583   | 0.574  | 3.7       |
| O <sub>1</sub>  | -75.78928   | -1.040 | 7.9       |
| O <sub>2</sub>  | -75.78923   | -1.040 | 7.9       |
| O <sub>3</sub>  | -75.78951   | -1.040 | 7.9       |

$$E_{\text{Tot}} - \Sigma E_{\Omega} = 22.8 \text{ kcal mol}^{-1} \quad Q_{\text{Tot}} - \Sigma Q_{\Omega} = -0.0009e$$

| Delocalization index | $\delta(\text{Ni}_i, x)$ | $\delta(\text{C}_i, x)$ |
|----------------------|--------------------------|-------------------------|
| Ni <sub>2</sub>      | 0.2370                   |                         |
| Ni <sub>3</sub>      | 0.2370                   |                         |
| C <sub>1</sub>       | 1.3119                   |                         |
| C <sub>2</sub>       | 0.0288                   | 0.0168                  |
| C <sub>3</sub>       | 0.6343                   | 0.0168                  |
| O <sub>1</sub>       | 0.2211                   | 1.4085                  |
| O <sub>2</sub>       | 0.0142                   | 0.0034                  |
| O <sub>3</sub>       | 0.5808                   | 0.0314                  |

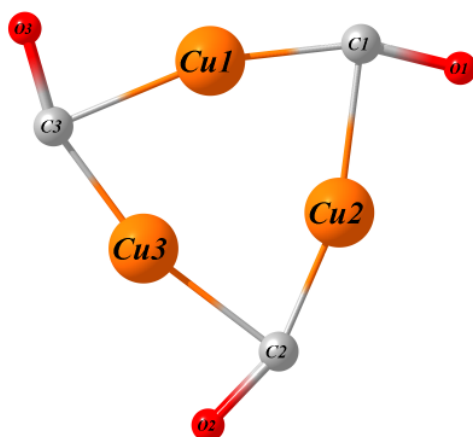

| Atoms           | E           | Q      | $\lambda$ |
|-----------------|-------------|--------|-----------|
| Cu <sub>1</sub> | -1640.86824 | 0.374  | 27.1      |
| Cu <sub>2</sub> | -1640.86480 | 0.375  | 27.1      |
| Cu <sub>3</sub> | -1640.86742 | 0.375  | 27.1      |
| C <sub>1</sub>  | -37.51422   | 0.364  | 3.9       |
| C <sub>2</sub>  | -37.51524   | 0.362  | 3.9       |
| C <sub>3</sub>  | -37.51481   | 0.363  | 3.9       |
| O <sub>1</sub>  | -75.72861   | -1.071 | 8.0       |
| O <sub>2</sub>  | -75.72863   | -1.071 | 8.0       |
| O <sub>3</sub>  | -75.72862   | -1.071 | 8.0       |

$$E_{\text{Tot}} - \Sigma E_{\Omega} = 7.0 \text{ kcal mol}^{-1} \quad Q_{\text{Tot}} - \Sigma Q_{\Omega} = 0.0001 e$$

| Delocalization index | $\delta(\text{Cu}_1, x)$ | $\delta(\text{C}_1, x)$ |
|----------------------|--------------------------|-------------------------|
| Cu <sub>2</sub>      | 0.38                     |                         |
| Cu <sub>3</sub>      | 0.38                     |                         |
| C <sub>1</sub>       | 1.01                     |                         |
| C <sub>2</sub>       | 0.10                     | 0.12                    |
| C <sub>3</sub>       | 0.54                     | 0.12                    |
| O <sub>1</sub>       | 0.15                     | 1.44                    |
| O <sub>2</sub>       | 0.06                     | 0.06                    |
| O <sub>3</sub>       | 0.35                     | 0.07                    |

**Scheme S-2. Wiberg Bond Index Data at BP86/6-311+G(d) Computational Level**

Italic values in parenthesis are bond lengths.

*CO*

C–O: 2.2999 (1.140)

*Ti<sub>3</sub>(CO)<sub>3</sub>*

Ti(1)–Ti(2): 0.9669 (2.730)

Ti(1)–C(1): 0.6895 (2.062)

Ti(1)–C(2): 1.1364 (1.937)

Ti(1)–O(3): 0.4188 (2.110)

C(1)–O(3): 1.4644 (1.259)

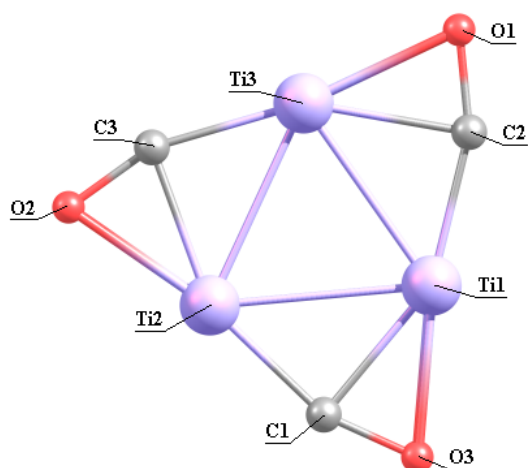

*V<sub>3</sub>(CO)<sub>3</sub><sup>+</sup>*

V(1)–V(2): 1.7766 (2.280)

V(1)–C(1): 0.4898 (2.055)

V(1)–C(2): 0.8893 (1.926)

V(1)–O(3): 0.2937 (2.245)

C(1)–O(3): 1.8671 (1.196)

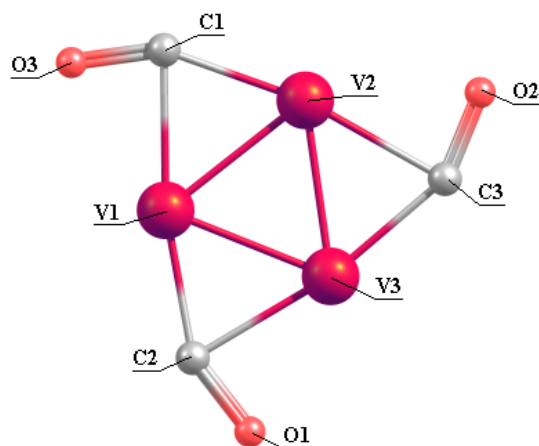

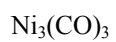

Ni(1)–Ni(2): 0.0836 (3.054)

Ni(1)–C(1): 0.5095 (1.954)

Ni(1)–C(2): 0.8929 (1.742)

Ni(1)–O(3): 0.2426 (1.981)

C(1)–O(3): 1.7965 (1.213)

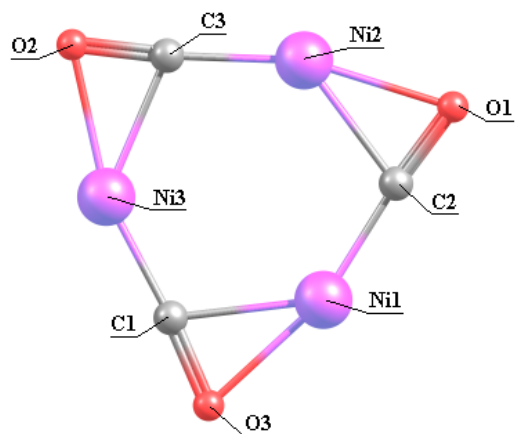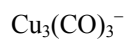

Cu(1)–Cu(2): 0.1000 (2.396)

Cu(1)–C(1): 0.3373 (2.045)

Cu(1)–C(2): 0.5368 (1.825)

Cu(1)–O(3): 0.1255 (2.264)

C(1)–O(3): 1.6034 (1.228)

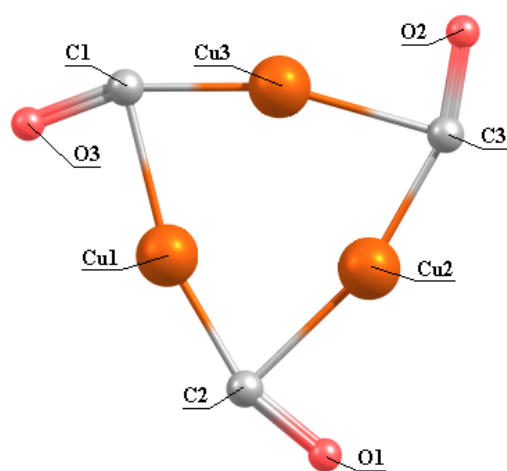

**The Cartesian coordinates of the optimized geometry (BP86/6-311+G(d)) of the species considered in this paper.**

$\text{Sc}_3(\text{CO})_3^+$

|          |      |              |              |             |
|----------|------|--------------|--------------|-------------|
| SCANDIUM | 21.0 | 0.000000000  | 1.904856000  | 0.000000000 |
| SCANDIUM | 21.0 | -1.649654000 | -0.952428000 | 0.000000000 |
| SCANDIUM | 21.0 | 1.649654000  | -0.952428000 | 0.000000000 |
| CARBON   | 6.0  | -2.095295000 | 1.089354000  | 0.000000000 |
| CARBON   | 6.0  | 1.991056000  | 1.269902000  | 0.000000000 |
| CARBON   | 6.0  | 0.104239000  | -2.359256000 | 0.000000000 |
| OXYGEN   | 8.0  | 3.039782000  | 0.598539000  | 0.000000000 |
| OXYGEN   | 8.0  | -1.001541000 | -2.931797000 | 0.000000000 |
| OXYGEN   | 8.0  | -2.038241000 | 2.333259000  | 0.000000000 |

$\text{Ti}_3(\text{CO})_3$

|          |      |              |              |             |
|----------|------|--------------|--------------|-------------|
| TITANIUM | 22.0 | 0.000000000  | 1.576079000  | 0.000000000 |
| TITANIUM | 22.0 | -1.364924000 | -0.788039000 | 0.000000000 |
| TITANIUM | 22.0 | 1.364924000  | -0.788039000 | 0.000000000 |
| CARBON   | 6.0  | -1.992451000 | 1.044369000  | 0.000000000 |
| CARBON   | 6.0  | 1.900675000  | 1.203329000  | 0.000000000 |
| CARBON   | 6.0  | 0.091776000  | -2.247697000 | 0.000000000 |
| OXYGEN   | 8.0  | 2.985240000  | 0.563111000  | 0.000000000 |
| OXYGEN   | 8.0  | -1.004951000 | -2.866849000 | 0.000000000 |
| OXYGEN   | 8.0  | -1.980288000 | 2.303738000  | 0.000000000 |

$\text{V}_3(\text{CO})_3^+$

|          |      |              |              |             |
|----------|------|--------------|--------------|-------------|
| CARBON   | 6.0  | -2.036730000 | 1.045918000  | 0.000000000 |
| CARBON   | 6.0  | 1.924156000  | 1.240901000  | 0.000000000 |
| CARBON   | 6.0  | 0.112574000  | -2.286819000 | 0.000000000 |
| OXYGEN   | 8.0  | 2.964341000  | 0.650543000  | 0.000000000 |
| OXYGEN   | 8.0  | -0.918784000 | -2.892466000 | 0.000000000 |
| OXYGEN   | 8.0  | -2.045557000 | 2.241923000  | 0.000000000 |
| VANADIUM | 23.0 | 0.000000000  | 1.315758000  | 0.000000000 |
| VANADIUM | 23.0 | -1.139480000 | -0.657879000 | 0.000000000 |
| VANADIUM | 23.0 | 1.139480000  | -0.657879000 | 0.000000000 |

$\text{Cr}_3(\text{CO})_3^{2+}$

|          |      |              |              |             |
|----------|------|--------------|--------------|-------------|
| CARBON   | 6.0  | 2.172580000  | 0.537520000  | 0.000000000 |
| CARBON   | 6.0  | -0.620784000 | -2.150270000 | 0.000000000 |
| CARBON   | 6.0  | -1.551796000 | 1.612749000  | 0.000000000 |
| OXYGEN   | 8.0  | -1.792043000 | -2.320984000 | 0.000000000 |
| OXYGEN   | 8.0  | -1.114010000 | 2.712446000  | 0.000000000 |
| OXYGEN   | 8.0  | 2.906052000  | -0.391463000 | 0.000000000 |
| CHROMIUM | 24.0 | 0.502600000  | 1.280277000  | 0.000000000 |
| CHROMIUM | 24.0 | 0.857452000  | -1.075403000 | 0.000000000 |
| CHROMIUM | 24.0 | -1.360053000 | -0.204874000 | 0.000000000 |

$\text{Ni}_3(\text{CO})_3$

|        |      |              |              |             |
|--------|------|--------------|--------------|-------------|
| CARBON | 6.0  | -1.726576000 | 0.848725000  | 0.000000000 |
| CARBON | 6.0  | 1.598186000  | 1.070914000  | 0.000000000 |
| CARBON | 6.0  | 0.128359000  | -1.919692000 | 0.000000000 |
| OXYGEN | 8.0  | 2.746651000  | 0.680025000  | 0.000000000 |
| OXYGEN | 8.0  | -0.784577000 | -2.718676000 | 0.000000000 |
| OXYGEN | 8.0  | -1.962212000 | 2.038800000  | 0.000000000 |
| NICKEL | 28.0 | -0.000054000 | 1.762902000  | 0.000000000 |
| NICKEL | 28.0 | 1.526841000  | -0.881597000 | 0.000000000 |
| NICKEL | 28.0 | -1.526618000 | -0.881400000 | 0.000000000 |

$\text{Cu}_3(\text{CO})_3^-$

|        |      |              |              |             |
|--------|------|--------------|--------------|-------------|
| CARBON | 6.0  | -1.998126000 | 0.948390000  | 0.000000000 |
| CARBON | 6.0  | 1.820393000  | 1.256233000  | 0.000000000 |
| CARBON | 6.0  | 0.177733000  | -2.204623000 | 0.000000000 |
| OXYGEN | 8.0  | 2.940472000  | 0.753288000  | 0.000000000 |
| OXYGEN | 8.0  | -0.817869000 | -2.923168000 | 0.000000000 |
| OXYGEN | 8.0  | -2.122603000 | 2.169880000  | 0.000000000 |
| COPPER | 29.0 | 0.000000000  | 1.383258000  | 0.000000000 |
| COPPER | 29.0 | 1.197937000  | -0.691629000 | 0.000000000 |
| COPPER | 29.0 | -1.197937000 | -0.691629000 | 0.000000000 |
